# Supplementary material for: MPT0B098, a Microtubule Inhibitor, Suppresses JAK2/STAT3 Signaling Pathway through Modulation of SOCS3 Stability in Oral Squamous Cell Carcinoma
Source: PubMed Central journal article supplement (PMC4930189; doi:10.1371/journal.pone.0158440), 2016-07-01

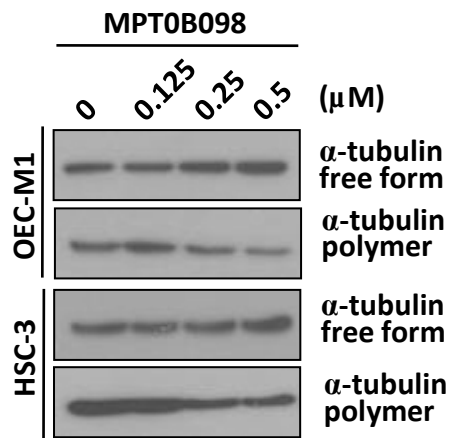

Supplement: pone.0158440.s001.pdf [file pone.0158440.s001.pdf]
